# Supplementary material
Source: Elsevier journal article supplement (https://univ-rennes.hal.science/hal-01439351v1/file/mmc1.pdf)
Supplement: mmc1 [file mmc1.pdf]

**Table. Clinicopathological, FISH and IHC characteristics of patients and their tumors**

| Case N° | Sex/Age | Tumor location  | Size | Specimen | FISH MDM2/CDK4 | IHC MDM2/CDK4/p16 | Final diagnosis/grade FNLCCC             |
|---------|---------|-----------------|------|----------|----------------|-------------------|------------------------------------------|
| 1       | M/88    | Inguinal        | 10   | ES       | NA/NA          | +/-/-             | undifferentiated sarcoma NOS/3           |
| 2       | M/58    | Retroperitoneum | 20   | B        | A/A            | +/+/+             | DDLPS/2                                  |
| 3       | F/78    | Thigh           | 19   | B        | A/NA           | +/-/+             | ALT/WDLPS sclerosing/1                   |
| 4       | M/48    | Jugal           | 8    | ES       | NA/NA          | -/-/-             | lipoma                                   |
| 5       | F/63    | Arm             | 11,5 | B        | NA/NA          | -/-/+             | undifferentiated sarcoma NOS/3           |
| 6       | F/35    | Leg             | 8    | B        | NA/NA          | -/-/+             | undifferentiated pleomorphic sarcoma/3   |
| 7       | M/71    | Abdominal       | 12   | B        | A/A            | +/+/+             | DDLPS/2                                  |
| 8       | M/50    | Pelvis          | 17   | ES       | NA/NA          | -/-/+             | lipoma                                   |
| 9       | F/70    | Pelvis          | 14   | ES       | NA/NA          | -/-/-             | lipoma                                   |
| 10      | M/62    | Shoulder        | 11   | ES       | NA/NA          | -/-/-             | lipomatosis                              |
| 11      | M/75    | Arm             | 4,5  | B        | NA/NA          | -/-/+             | pleomorphic lipoma                       |
| 12      | M/36    | Cervical        | 9    | ES       | NA/NA          | -/-/+             | lipomatosis                              |
| 13      | F/62    | Retroperitoneum | 10   | B        | NA/NA          | +/-/+             | undifferentiated sarcoma NOS/3           |
| 14      | M/61    | Thigh           | 4,5  | ES       | A/NA           | +/-/-             | DDLPS/3                                  |
| 15      | M/61    | Retroperitoneum | 25   | B        | A/A            | +/+/+             | ALT/WDLPS sclerosing/1                   |
| 16      | M/77    | Wrist           | 5    | ES       | NA/NA          | -/-/-             | lipoma                                   |
| 17      | F/54    | Retroperitoneum | 16   | B        | A/A            | +/+/+             | DDLPS/2                                  |
| 17 bis  | F/54    | Retroperitoneum | 16   | ES       | A/A            | +/+/+             | DDLPS/3                                  |
| 18      | M/48    | Thigh           | 30   | ES       | NA/NA          | +/-/-             | undifferentiated pleomorphic sarcoma/3   |
| 19      | F/49    | Buttock         | 15   | ES       | NA/NA          | -/-/+             | lipoma                                   |
| 20      | F/55    | Retroperitoneum | 19   | B        | A/A            | +/+/+             | ALT/WDLPS lipoma-like/1                  |
| 21      | M/67    | Retroperitoneum | 20   | ES       | NA/NA          | -/-/+             | undifferentiated pleomorphic sarcoma/3   |
| 22      | M/47    | Shoulder        | 5    | ES       | NA/NA          | -/-/-             | lipoma                                   |
| 23      | F/54    | Arm             | 10   | ES       | NA/NA          | -/-/-             | spindle cell lipoma                      |
| 24      | F/81    | Thigh           | 13   | ES       | NA/NA          | +/-/-             | myxofibrosarcoma/3                       |
| 25      | F/67    | Retroperitoneum | 9    | B        | NA/NA          | -/-/+             | conventional osteoblastic osteosarcoma/3 |
| 26      | F/43    | Thigh           | 8    | B        | NA/NA          | -/-/+             | lipoma                                   |
| 27      | M/71    | Thigh           | 6,5  | B        | NA/NA          | +/-/-             | undifferentiated sarcoma NOS/2           |
| 27 bis  | M/71    | Thigh           | 6,5  | ES       | NA/NA          | +/-/-             | myxofibrosarcoma/2                       |
| 28      | M/58    | Cervical        | 9    | ES       | NA/NA          | -/-/-             | lipoma                                   |
| 29      | M/79    | Thorax          | 12   | ES       | A/A            | +/+/+             | ALT/WDLPS lipoma-like/1                  |
| 30      | F/68    | Retroperitoneum | 20   | B        | A/A            | +/+/+             | DDLPS/2                                  |
| 31      | M/79    | Thorax          | 9    | B        | NA/NA          | -/-/-             | lipoma                                   |
| 32      | M/44    | Abdominal       | 18   | ES       | NA/NA          | -/-/-             | lipoma                                   |
| 33      | M/73    | Thigh           | 25   | B        | A/A            | +/+/+             | ALT/WDLPS lipoma-like/1                  |
| 34      | F/56    | Shoulder        | 13   | ES       | NA/NA          | -/-/-             | lipoma                                   |
| 35      | M/50    | Thigh           | 28   | B        | NA/NA          | -/-/+             | lipoma                                   |
| 35 bis  | M/50    | Thigh           | 28   | ES       | NA/NA          | -/-/-             | lipoma                                   |
| 36      | F/68    | Forearm         | 6,5  | B        | NA/NA          | -/-/+             | intramuscular lipoma                     |
| 37      | M/62    | Thorax          | 16   | ES       | NA/NA          | +/-/-             | undifferentiated sarcoma NOS/3           |
| 38      | F/71    | Retroperitoneum | 20   | ES       | A/A            | +/+/+             | ALT/WDLPS lipoma-like/1                  |
| 39      | F/34    | Abdominal       | 12   | ES       | A/A            | +/+/+             | ALT/WDLPS sclerosing/1                   |
| 40      | F/72    | Back            | 13   | ES       | NA/NA          | -/-/-             | lipoma                                   |
| 41      | M/51    | Abdominal       | 7    | ES       | A/A            | +/+/+             | DDLPS/3                                  |
| 42      | M/79    | Thorax          | 10   | ES       | A/A            | +/+/+             | DDLPS/2                                  |
| 43      | M/72    | Thigh           | 18   | B        | NA/NA          | +/-/-             | lipoma                                   |
| 44      | M/79    | Arm             | 5,5  | ES       | NA/NA          | +/-/-             | myxofibrosarcoma/2                       |
| 45      | F/45    | Thigh           | 8    | B        | NA/NA          | +/-/-             | undifferentiated pleomorphic sarcoma/3   |
| 46      | F/60    | Arm             | 7    | B        | NA/NA          | -/-/+             | intramuscular lipoma                     |
| 47      | F/73    | Retroperitoneum | 20   | ES       | A/A            | +/+/+             | DDLPS/2                                  |

|        |      |                 |      |    |       |     |                                            |
|--------|------|-----------------|------|----|-------|-----|--------------------------------------------|
| 48     | M/35 | Thorax          | 15   | ES | NA/NA | -/- | lipoma                                     |
| 49     | M/19 | Scrotum         | 10   | ES | NA/NA | -/+ | lipoma                                     |
| 50     | M/55 | Thigh           | 8,5  | ES | NA/NA | -/+ | spindle cell lipoma                        |
| 51     | M/63 | Retroperitoneum | 28   | ES | NA/NA | +/+ | undifferentiated sarcoma NOS/2             |
| 51 bis | M/62 | Retroperitoneum | 17   | ES | NA/NA | -/- | undifferentiated sarcoma NOS/2             |
| 52     | M/60 | Retroperitoneum | 14   | ES | A/A   | +/+ | DDLPS/2                                    |
| 53     | M/56 | Thigh           | 20   | ES | A/A   | +/+ | ALT/WDLPS lipoma-like/1                    |
| 54     | M/60 | Thigh           | 20   | B  | NA/NA | -/+ | lipoma                                     |
| 55     | M/59 | Back            | 9    | ES | NA/NA | -/- | lipoma                                     |
| 56     | F/57 | Thigh           | 15   | B  | NA/NA | -/- | lipoma                                     |
| 56 bis | F/58 | Thigh           | 15   | ES | NA/NA | -/- | lipoma                                     |
| 57     | F/31 | Rectum          | 10   | B  | NA/NA | -/+ | lipoma                                     |
| 58     | M/59 | Arm             | 5,5  | ES | NA/NA | -/- | lipoma                                     |
| 59     | M/39 | Buttock         | 10   | B  | NA/NA | -/- | lipoma                                     |
| 60     | M/50 | Thigh           | 20   | ES | NA/NA | -/- | lipoma                                     |
| 61     | M/89 | Shoulder        | 11,5 | B  | A/A   | +/+ | ALT/WDLPS inflammatory/1                   |
| 62     | M/89 | Thigh           | 24   | ES | A/A   | -/+ | ALT/WDLPS lipoma-like/1                    |
| 63     | F/47 | Thigh           | 12,5 | B  | NA/NA | +/- | undifferentiated sarcoma NOS/2             |
| 64     | M/70 | Thigh           | 14   | B  | A/A   | -/+ | ALT/WDLPS lipoma-like/1                    |
| 65     | F/71 | Thigh           | 11   | B  | A/A   | +/- | ALT/WDLPS lipoma-like/1                    |
| 66     | M/71 | Forearm         | 20   | ES | NA/NA | -/- | lipoma                                     |
| 67     | M/66 | Abdominal       | 9,5  | B  | A/A   | +/+ | DDLPS/2                                    |
| 67 bis | M/66 | Abdominal       | 9,5  | ES | A/A   | +/+ | DDLPS/3                                    |
| 68     | F/65 | Retroperitoneum | 10   | ES | A/A   | +/+ | DDLPS/3                                    |
| 69     | M/52 | Thorax          | 7    | B  | A/A   | +/+ | ALT/WDLPS sclerosing/1                     |
| 70     | M/29 | Thorax          | 8    | ES | NA/NA | -/- | lipoma                                     |
| 71     | M/24 | Thigh           | 9    | ES | NA/NA | -/+ | lipoma                                     |
| 72     | F/79 | Abdominal       | 13   | ES | NA/NA | -/- | lipoma                                     |
| 73     | M/64 | Thigh           | 29   | B  | A/NA  | +/- | ALT/WDLPS lipoma-like/1                    |
| 74     | M/64 | Hip             | 12   | B  | NA/NA | -/- | lipoma                                     |
| 75     | F/79 | Thigh           | 15   | B  | A/NA  | +/- | ALT/WDLPS lipoma-like/1                    |
| 76     | M/80 | Abdominal       | 10   | B  | A/A   | +/+ | ALT/WDLPS sclerosing/1                     |
| 77     | M/88 | Thigh           | 3,5  | ES | NA/NA | +/- | myxofibrosarcoma/3                         |
| 78     | M/87 | Thigh           | 25   | B  | NA/NA | -/+ | lipoma                                     |
| 79     | M/62 | Shoulder        | 8    | B  | NA/NA | -/- | lipoma                                     |
| 80     | F/82 | Sacrum          | 14   | ES | NA/NA | +/- | undifferentiated pleomorphic sarcoma/3     |
| 81     | F/85 | Retroperitoneum | 5,3  | B  | A/A   | +/- | DDLPS/2                                    |
| 82     | M/45 | Inguinal        | 11,5 | ES | NA/NA | -/- | lipoma                                     |
| 83     | M/80 | Retroperitoneum | 23   | ES | A/A   | +/+ | DDLPS/3                                    |
| 84     | M/59 | Neck            | 5    | B  | NA/NA | -/+ | lipoma                                     |
| 85     | F/29 | Shoulder        | 9    | ES | NA/NA | -/- | lipoma                                     |
| 86     | M/67 | Thigh           | 13   | ES | A/A   | +/+ | ALT/WDLPS lipoma-like/1                    |
| 87     | F/70 | Hip             | 10   | B  | NA/NA | -/- | intramuscular lipoma                       |
| 88     | M/65 | Retroperitoneum | 30   | ES | A/A   | +/+ | ALT/WDLPS sclerosing/1                     |
| 89     | M/76 | Knee            | 5    | ES | A/A   | +/+ | DDLPS/2                                    |
| 90     | F/65 | Thigh           | 11   | B  | A/A   | +/+ | ALT/WDLPS lipoma-like/1                    |
| 91     | F/36 | Thigh           | 12   | ES | NA/NA | -/- | lipoma                                     |
| 92     | F/48 | Forehead        | 5,5  | ES | NA/NA | +/- | malignant peripheral nerve sheath tumour/3 |
| 93     | M/60 | Retroperitoneum | 18   | ES | A/A   | +/- | DDLPS/2                                    |
| 94     | M/77 | Retroperitoneum | 20   | ES | A/A   | +/+ | DDLPS/2                                    |
| 95     | M/78 | Thigh           | 16   | B  | NA/NA | -/+ | undifferentiated sarcoma NOS/3             |

F: female, M: male, B: biopsy, ES: excision specimen, A: amplified and NA: non-amplified.
